# Supplementary material for: Mapping of agronomic traits, disease resistance and malting quality in a wide cross of two-row barley cultivars
Source: PLOS journal article supplement (doi:10.1371/journal.pone.0219042), 2019-07-17
Supplement: S4 (10.1371/journal.pone.0219042.s004) [file journal.pone.0219042.s004]

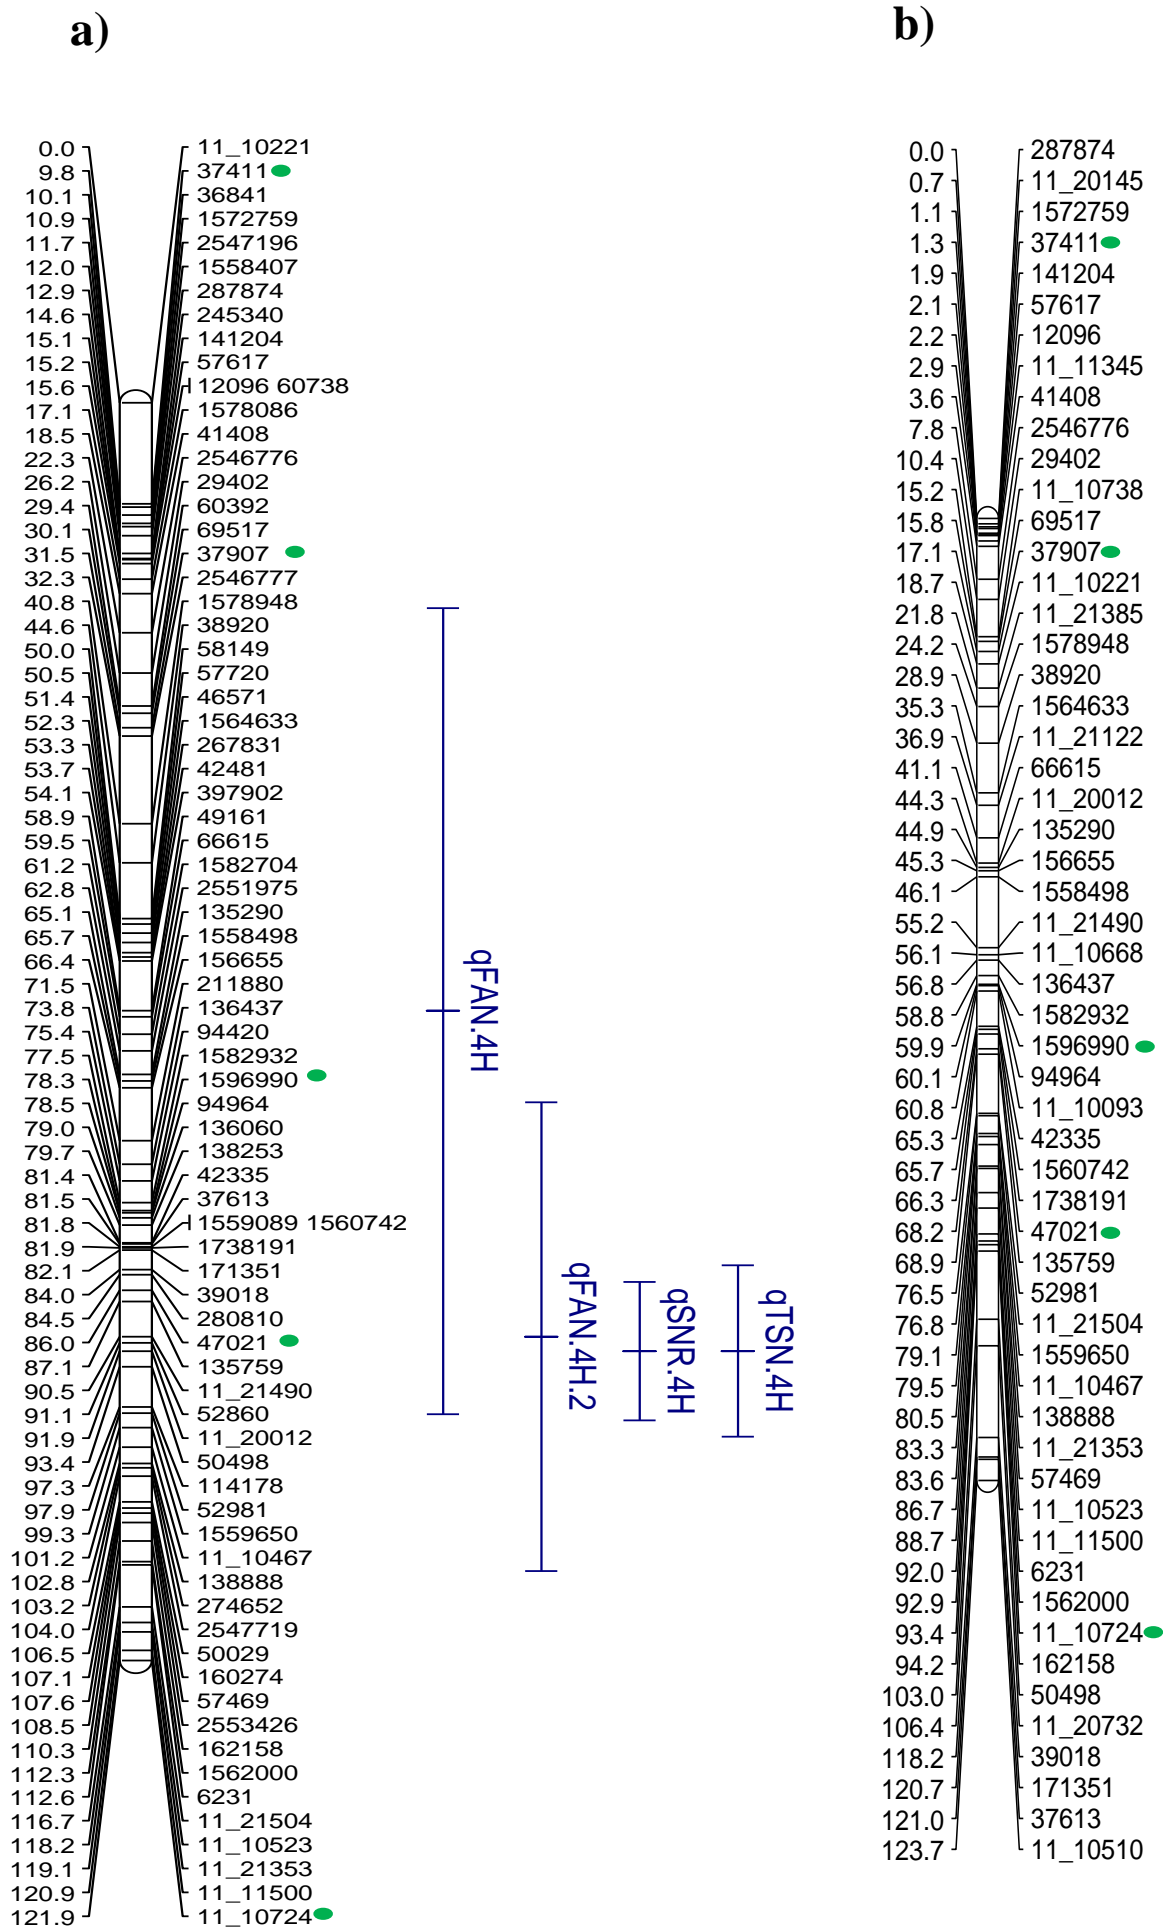

● Examples of common SNP markers

**S4 Fig. QTL identified on chromosome 4H.** a) QTL in the Chevallier × Tipple F5 population and b) QTL in the Chevallier × Tipple F7 population.
